# Supplementary material for: Rapid size fractionation of metal species in paired human serum and cerebrospinal fluid samples using ultrafiltration with off-line element selective detection
Source: Royal Society of Chemistry journal article supplement (doi:10.1039/b913468a), 2010-01-01
Supplement: b913468a.pdf [file b913468a.pdf]

Supplementary Information for the article

**Rapid size fractionation of metal species in paired human serum and cerebrospinal fluid samples using ultrafiltration with off-line element selective detection**

Volker Nischwitz <sup>a,\*</sup>, Achim Berthele <sup>b</sup>, Bernhard Michalke <sup>a</sup>

<sup>a</sup> Helmholtz Zentrum München, Institute of Ecological Chemistry, 85764 Neuherberg, Germany

<sup>b</sup> Department of Neurology, Technische Universität München, Klinikum rechts der Isar, 81675 Munich, Germany

\* Corresponding author: volker.nischwitz@helmholtz-muenchen.de

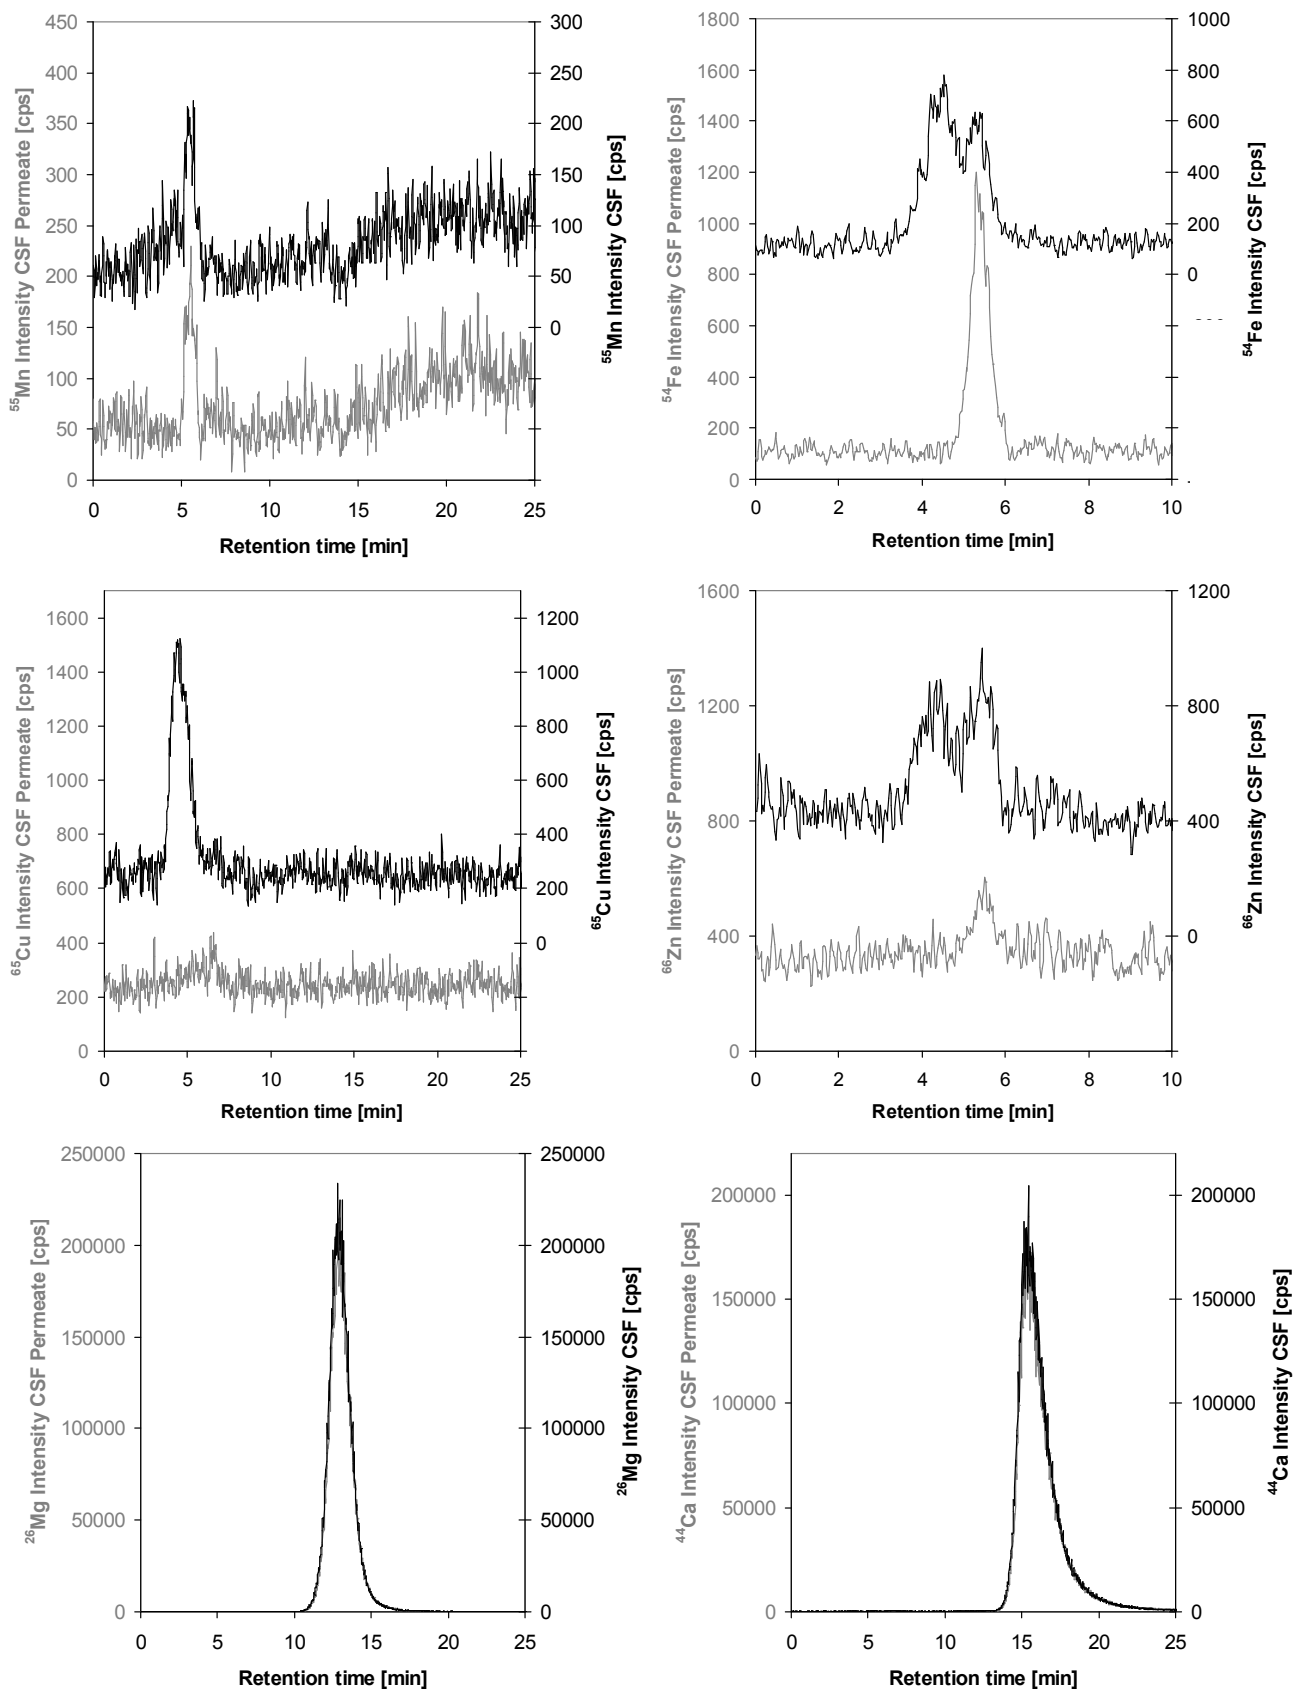

**Figure A** SEC-ICP-MS chromatograms of a CSF sample (black) and the associated CSF permeate (grey) for Mn, Fe, Cu, Zn, Ca and Mg (3-point average smoothing was applied for Mn, Fe, Cu and Zn; for Fe and Zn only the interesting part of the chromatogram until 10 minutes retention time is shown, no peaks were observed later than 10 minutes).

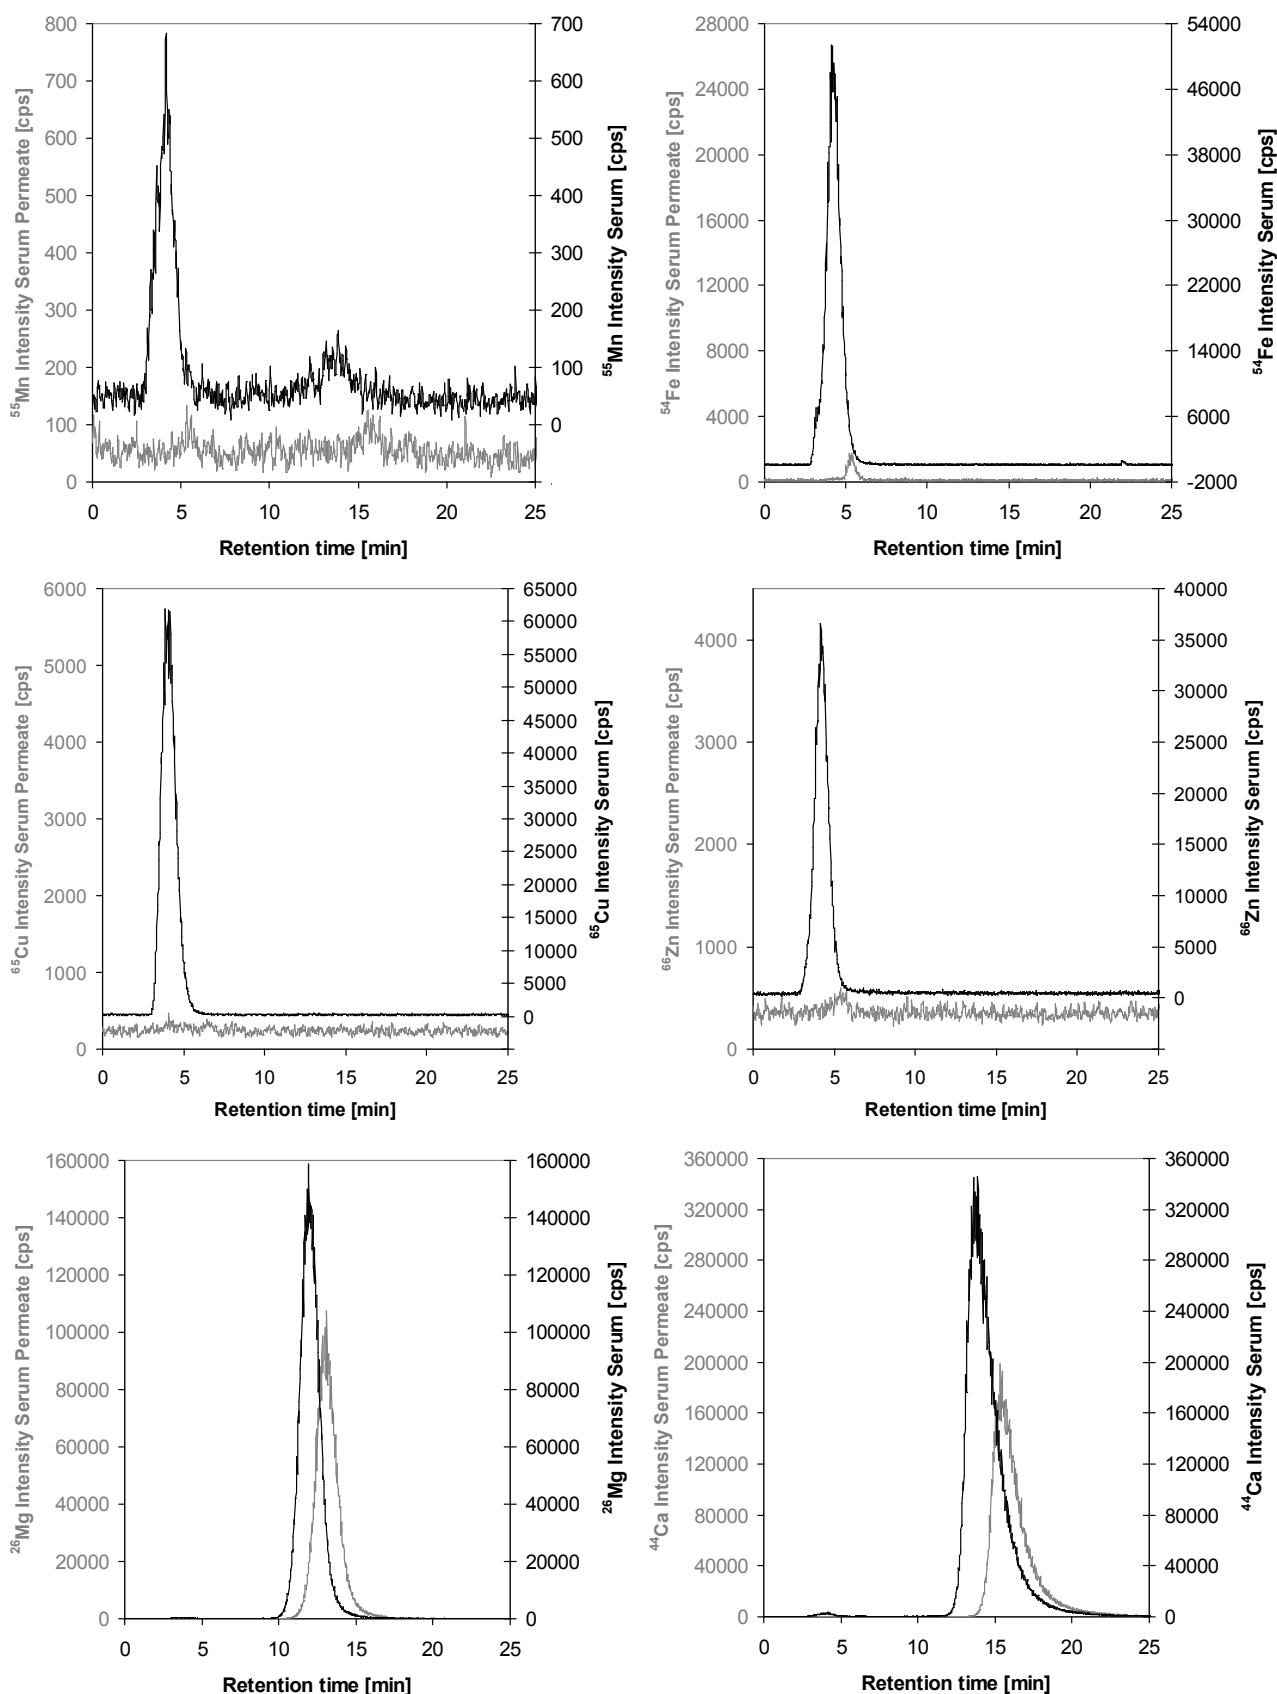

**Figure B** SEC-ICP-MS chromatograms of a serum sample (black) and the associated serum permeate (grey) (same patient as CSF sample in Figure A) for Mn, Fe, Cu, Zn, Ca and Mg (3-point average smoothing was applied for Mn, for Cu in serum permeate and for Zn in serum permeate).

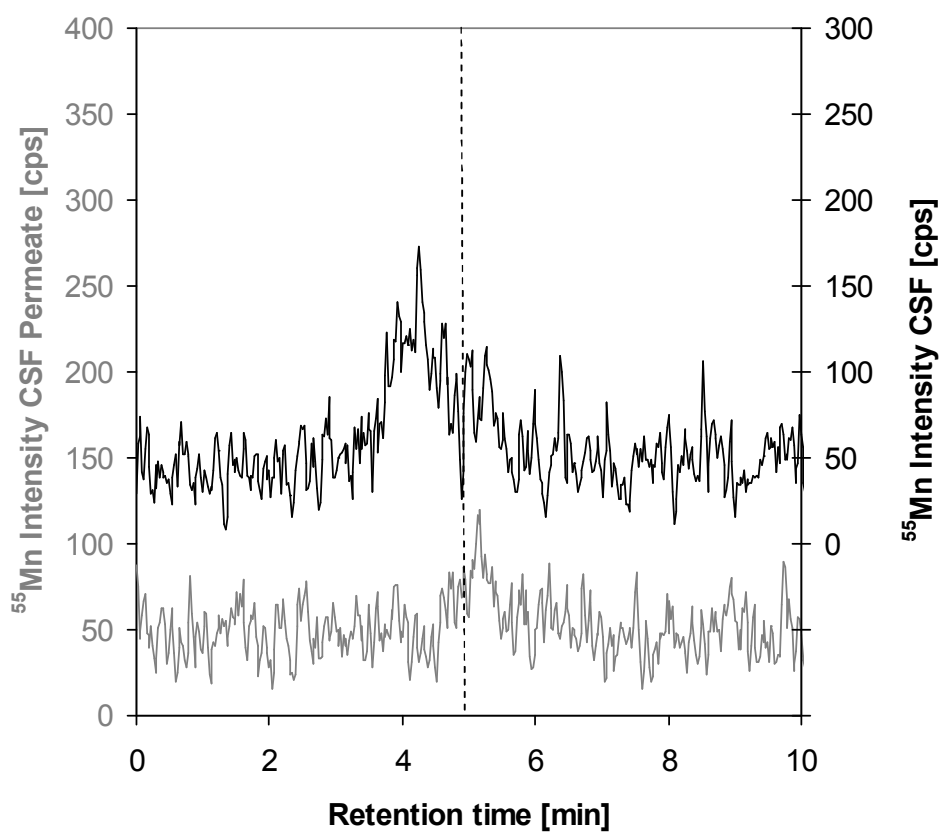

**Figure C** <sup>55</sup>Mn SEC-ICP-MS chromatograms of another CSF sample (black) and the corresponding permeate (grey) obtained from ultrafiltration (3-point average smoothing was applied).

**Table A** Results for reference sera Seronorm™ (a) and ClinChek® (b) determined using various dilutions (1:8 to 1:40) with ICP-DRC-MS (for Mn, Fe, Cu and Zn both Y and Rh were used as internal standards, for Mg and Ca only Y was used as internal standard). The values in bold print are within the control range (Mn in Seronorm™ as well as Fe and Ca in ClinChek® are not certified).

| a) | Determined concentrations for Seronorm™ [ $\mu\text{g L}^{-1}$ ] |                                                 |                                                 |                                                 |                                                 |
|----|------------------------------------------------------------------|-------------------------------------------------|-------------------------------------------------|-------------------------------------------------|-------------------------------------------------|
|    | 1:8                                                              | 1:16                                            | 1:24                                            | 1:32                                            | 1:40                                            |
| Mn | 6.8 ± 0.2                                                        | 7.4 ± 0.3                                       | 7.1 ± 0.4                                       | 7.5 ± 0.6                                       | 7.3 ± 0.8                                       |
| Fe | <b>930 ± 10</b>                                                  | <b>1060 ± 20</b>                                | <b>960 ± 30</b>                                 | <b>960 ± 40</b>                                 | <b>960 ± 50</b>                                 |
| Cu | <b>1030 ± 30</b>                                                 | <b>1130 ± 50</b>                                | <b>1150 ± 70</b>                                | <b>1200 ± 100</b>                               | <b>1200 ± 100</b>                               |
| Zn | <b>1290 ± 10</b>                                                 | <b>1460 ± 20</b>                                | 1510 ± 30                                       | 1630 ± 40                                       | 1600 ± 50                                       |
| Mg | <b>27*10<sup>3</sup> ± 2*10<sup>3</sup></b>                      | <b>27*10<sup>3</sup> ± 4*10<sup>3</sup></b>     | <b>27*10<sup>3</sup> ± 6*10<sup>3</sup></b>     | <b>27*10<sup>3</sup> ± 8*10<sup>3</sup></b>     | <b>26*10<sup>3</sup> ± 10*10<sup>3</sup></b>    |
| Ca | <b>81.5*10<sup>3</sup> ± 0.1*10<sup>3</sup></b>                  | <b>82.0*10<sup>3</sup> ± 0.2*10<sup>3</sup></b> | <b>80.7*10<sup>3</sup> ± 0.2*10<sup>3</sup></b> | <b>80.3*10<sup>3</sup> ± 0.3*10<sup>3</sup></b> | <b>80.6*10<sup>3</sup> ± 0.3*10<sup>3</sup></b> |

| b) | Determined concentrations for ClinChek® [ $\mu\text{g L}^{-1}$ ] |                                             |                                             |                                             |                                              |
|----|------------------------------------------------------------------|---------------------------------------------|---------------------------------------------|---------------------------------------------|----------------------------------------------|
|    | 1:8                                                              | 1:16                                        | 1:24                                        | 1:32                                        | 1:40                                         |
| Mn | <b>3.8 ± 0.1</b>                                                 | <b>3.8 ± 0.3</b>                            | <b>4.0 ± 0.5</b>                            | <b>4.1 ± 0.6</b>                            | <b>4.5 ± 0.8</b>                             |
| Fe | 1610 ± 10                                                        | 1530 ± 20                                   | 1570 ± 30                                   | 1600 ± 40                                   | 1640 ± 50                                    |
| Cu | <b>1440 ± 30</b>                                                 | <b>1500 ± 50</b>                            | <b>1610 ± 70</b>                            | <b>1700 ± 100</b>                           | <b>1700 ± 100</b>                            |
| Zn | <b>2120 ± 10</b>                                                 | <b>2310 ± 20</b>                            | <b>2540 ± 30</b>                            | <b>2720 ± 40</b>                            | <b>2810 ± 50</b>                             |
| Mg | <b>31*10<sup>3</sup> ± 2*10<sup>3</sup></b>                      | <b>30*10<sup>3</sup> ± 4*10<sup>3</sup></b> | <b>30*10<sup>3</sup> ± 6*10<sup>3</sup></b> | <b>30*10<sup>3</sup> ± 8*10<sup>3</sup></b> | <b>30*10<sup>3</sup> ± 10*10<sup>3</sup></b> |
| Ca | 780*10 <sup>3</sup> ± 60*10 <sup>3</sup>                         | 720*10 <sup>3</sup> ± 60*10 <sup>3</sup>    | 740*10 <sup>3</sup> ± 70*10 <sup>3</sup>    | 730*10 <sup>3</sup> ± 80*10 <sup>3</sup>    | 730*10 <sup>3</sup> ± 90*10 <sup>3</sup>     |
